# Supplementary material for: Molecular Taxonomy and Diversification of Atlantic Skates (Chondrichthyes, Rajiformes): Adding More Pieces to the Puzzle of Their Evolutionary History
Source: MDPI journal article supplement (doi:10.3390/life11070596), 2021-06-22
Supplement: s1 [file s1]

# Supplementary material of Molecular Taxonomy and Diversification of Atlantic Skates (Chondrichthyes, Rajiformes): Adding more Pieces to the Puzzle of Their Evolutionary History

**Table S1.** Complete list of skate species occurring in the North East (NEA), Central East (CEA), South East (SEA) and South West (SWA) Atlantic Ocean. References related to the barcode data and the last global assessment by IUCN are included. LC: least concern, NT: near threatened, VU: vulnerable, EN: endangered, CR: critically endangered, NE: not evaluated. Grey highlights species and geographical areas covered by this study.

| Scientific Name (Author/s, Year)                                  | Common Name            | NEA | CEA | SEA | SWA | Barcoded in the area | Barcoded in other areas | References  | Global IUCN Last assessed |
|-------------------------------------------------------------------|------------------------|-----|-----|-----|-----|----------------------|-------------------------|-------------|---------------------------|
| <i>Amblyraja doellojuradoi</i> (Pozzi, 1935)                      | Southern thorny skate  |     |     |     | x   | yes                  | no                      | [1]         | LC 2019                   |
| <i>Amblyraja frerichsi</i> <sup>1</sup> (Krefft, 1968)            | Thickbody skate        |     |     |     | x   | no                   | no                      |             | DD 2004                   |
| <i>Amblyraja georgiana</i> <sup>1</sup> (Norman, 1938)            | Antarctic starry skate |     |     |     | x   | yes                  | no                      | Unpublished | DD 2019                   |
| <i>Amblyraja hyperborea</i> (Collett, 1879)                       | Arctic skate           | x   |     | x   |     | yes                  | yes                     | [2,3]       | LC 2016                   |
| <i>Amblyraja jenseni</i> <sup>1</sup> (Bigelow & Schroeder, 1950) | Shorttail skate        | x   |     |     |     | yes                  | no                      | [2]         | LC 2019                   |
| <i>Amblyraja radiata</i> (Donovan, 1808)                          | Starry ray             | x   |     |     |     | yes                  | yes                     | [2–5]       | VU 2019                   |
| <i>Amblyraja taaf</i> <sup>1</sup> (Meisner 1987)                 | Whiteleg skate         |     |     |     | x   | no                   | no                      | [8]         | DD 2020                   |
| <i>Atlantoraja castelnaui</i> (Miranda Ribeiro, 1907)             | Spotback skate         |     |     |     | x   | yes                  | no                      | [1,6,7]     | CR 2019                   |
| <i>Atlantoraja cyclophora</i> (Regan, 1903)                       | Eyespot skate          |     |     |     | x   | yes                  | no                      | [1,6]       | EN 2019                   |
| <i>Atlantoraja platana</i> (Günther, 1880)                        | La Plata skate         |     |     |     | x   | yes                  | no                      | [1,6]       | EN 2019                   |
| <i>Bathyrāja albomaculata</i> (Norman, 1937)                      | White-dotted skate     |     |     |     | x   | yes                  | no                      | [1]         | VU 2019                   |
| <i>Bathyrāja brachyurops</i> (Fowler, 1910)                       | Broadnose skate        |     |     |     | x   | yes                  | no                      | [1,4]       | NT 2019                   |
| <i>Bathyrāja cousseauae</i> Díaz de Astarloa & Mabrugaña, 2004    | Joined-fins skate      |     |     |     | x   | yes                  | no                      | [1]         | LC 2019                   |
| <i>Bathyrāja griseocauda</i> (Norman, 1937)                       | Graytail skate         |     |     |     | x   | yes                  | no                      | [1]         | EN 2019                   |
| <i>Bathyrāja hesperaficana</i> Stehmann, 1995                     | West African skate     |     | x   |     |     | no                   | no                      |             | DD 2004                   |
| <i>Bathyrāja macloviana</i> (Norman, 1937)                        | Patagonian skate       |     |     |     | x   | yes                  | no                      | [1]         | NT 2019                   |
| <i>Bathyrāja magellanica</i> (Philippi, 1902)                     | Magellan skate         |     |     |     | x   | yes                  | no                      | [1]         | LC 2019                   |
| <i>Bathyrāja meridionalis</i> Stehmann, 1987                      | Dark-belly skate       |     |     |     | x   | yes                  | no                      | [8]         | LC 2019                   |
| <i>Bathyrāja multispinis</i> (Norman, 1937)                       | Multispine skate       |     |     |     | x   | yes                  | no                      | [1,4]       | NT 2019                   |
| <i>Bathyrāja pallida</i> (Forster, 1967)                          | Pale ray               | x   |     |     |     | yes*                 | no                      |             | LC 2019                   |

|                                                                                    |                        |   |   |   |            |     |                      |    |      |
|------------------------------------------------------------------------------------|------------------------|---|---|---|------------|-----|----------------------|----|------|
| <i>Bathyraja papilionifera</i> Stehmann, 1985                                      | Butterfly skate        |   |   | x | yes        | no  | [1]                  | LC | 2019 |
| <i>Bathyraja richardsoni</i> (Garrick, 1961)                                       | Richardson's ray       | x |   |   | this study | yes | [8,9]                | LC | 2015 |
| <i>Bathyraja scaphiops</i> (Norman, 1937)                                          | Cuphead skate          |   |   | x | yes        | yes | [1]                  | LC | 2019 |
| <i>Bathyraja schroederi</i> (Krefft, 1968)                                         | Whitemouth skate       |   |   | x | no         | no  |                      | LC | 2019 |
| <i>Bathyraja smithii</i> (Müller & Henle, 1841)                                    | African softnose skate |   |   | x | yes        | no  | Unpublished          | LC | 2019 |
| <i>Bathyraja spinicauda</i> (Jensen, 1914)                                         | Spinytail skate        | x |   |   | yes        | no  | [2,3]                | NT | 2019 |
| <i>Cruriraja durbanensis</i> (von Bonde & Swart, 1923)                             | Smoothnose legskate    |   |   | x | no         | no  |                      | DD | 2019 |
| <i>Cruriraja hulleyi</i> Aschliman, Ebert & Compagno, 2010                         | Roughnose legskate     |   |   | x | yes        | no  | Unpublished          | LC | 2019 |
| <i>Dactylobatus clarkii</i> (Bigelow & Schroeder, 1958)                            | Hookskate              |   |   | x | no         | no  |                      | LC | 2019 |
| <i>Dipturus argentinensis</i> Díaz de Astarloa, Mabragaña, Hanner & Figueroa, 2008 | Argentine Skate        |   |   | x | yes        | no  | [1]                  | DD | 2019 |
| <i>Dipturus batis</i> (Linnaeus, 1758)                                             | Blue skate             | x |   |   | yes        | no  | [5,10,11]            | CR | 2006 |
| <i>Dipturus doutrei</i> (Cadenat, 1960)                                            | Violet skate           |   | x | x | no         | no  |                      | DD | 2009 |
| <i>Dipturus intermedius</i> (Parnell, 1837)                                        | Flapper skate          | x |   |   | yes        | no  | [3]                  | NE | -    |
| <i>Dipturus lamillai</i> Concha, Caira, Ebert & Pomper, 2019                       | Warrah Skate           |   |   | x | no         | no  |                      | LC | 2020 |
| <i>Dipturus leptocaudus</i> (Krefft & Stehmann, 1975)                              | Thintail skate         |   |   | x | no         | no  |                      | VU | 2019 |
| <i>Dipturus mennii</i> Gomes & Paragó, 2001                                        | South Brazilian skate  |   |   | x | no         | no  |                      | CR | 2019 |
| <i>Dipturus nidarosiensis</i> (Storm, 1881)                                        | Norwegian skate        | x | x | x | yes        | yes | [3,4,10,12–15]       | NT | 2015 |
| <i>Dipturus oxyrinchus</i> (Linnaeus, 1758)                                        | Longnosed skate        | x | x |   | yes        | yes | [3,4,10,11,13,16–19] | NT | 2014 |
| <i>Dipturus pullopunctatus</i> (Smith, 1964)                                       | Slime skate            |   |   | x | yes        | no  | [4,20]               | LC | 2020 |
| <i>Dipturus springeri</i> (Wallace, 1967)                                          | Roughbelly skate       |   |   | x | yes        | no  | [4,20]               | LC | 2019 |
| <i>Dipturus teevani</i> (Bigelow & Schroeder, 1951)                                | Prickly brown ray      |   |   | x | no         | no  |                      | LC | 2019 |
| <i>Dipturus trachydermus</i> (Bigelow & Schroeder, 1950)                           | Roughskin Skate        |   |   | x | no         | no  |                      | EN | 2019 |
| <i>Gurgesiella dorsalis</i> McEachran & Compagno, 1980                             | Onefin skate           |   |   | x | no         | no  |                      | VU | 2019 |
| <i>Leucoraja circularis</i> (Couch, 1838)                                          | Sandy ray              | x | x |   | yes        | yes | [3,11,13,16,19]      | EN | 2014 |
| <i>Leucoraja compagno</i> (Stehmann, 1995)                                         | Tigertail skate        |   |   | x | no         | no  |                      | DD | 2019 |
| <i>Leucoraja fullonica</i> (Linnaeus, 1758)                                        | Shagreen ray           | x |   |   | yes        | yes | [3]                  | VU | 2014 |
| <i>Leucoraja leucosticta</i> (Stehmann, 1971)                                      | Whitedappled skate     |   |   | x | no         | no  |                      | DD | 2018 |
| <i>Leucoraja naevus</i> (Müller & Henle, 1841)                                     | Cuckoo ray             | x |   |   | yes        | no  | [4,5,11,13,16,19]    | LC | 2014 |
| <i>Leucoraja wallacei</i> (Hulley, 1970)                                           | Yellowspotted skate    |   |   | x | yes        | no  | [20]                 | VU | 2020 |

|                                                            |                           |   |   |   |   |            |     |                      |    |      |
|------------------------------------------------------------|---------------------------|---|---|---|---|------------|-----|----------------------|----|------|
| <i>Malacoraja krefftii</i> (Stehmann, 1978)                | Krefft's ray              | x |   |   |   | no         | yes | Unpublished          | LC | 2014 |
| <i>Malacoraja obscura</i> Carvalho, Gomes & Gadig, 2005    | Brazilian Soft Skate      |   |   |   | x | no         | no  |                      | LC | 2019 |
| <i>Malacoraja spinacidermis</i> (Barnard, 1923)            | Soft skate                | x | x | x |   | no         | yes | [2]                  | LC | 2020 |
| <i>Neoraja africana</i> (Stehmann & Séret, 1983)           | West African pygmy skate  |   | x |   |   | no         | no  |                      | DD | 2006 |
| <i>Neoraja caerulea</i> (Stehmann, 1976)                   | Blue ray                  | x |   |   |   | yes        | no  | [12]                 | LC | 2014 |
| <i>Neoraja iberica</i> Stehmann, Séret, Costa & Baro, 2008 | Iberian pygmy skate       | x |   |   |   | yes        | no  | [12,16]              | LC | 2014 |
| <i>Neoraja stehmanni</i> (Hulley, 1972)                    | South African Dwarf Skate |   |   |   | x | no         | no  |                      | LC | 2019 |
| <i>Psammobatis bergi</i> Marini, 1932                      | Blotched sandskate        |   |   |   | x | yes        | no  | Unpublished          | LC | 2019 |
| <i>Psammobatis extenta</i> (Garman, 1913)                  | Zipper sandskate          |   |   |   | x | yes        | no  | Unpublished          | LC | 2019 |
| <i>Psammobatis lentiginose</i> McEachran, 1983             | Freckled sandskate        |   |   |   | x | yes        | no  | [1]                  | LC | 2019 |
| <i>Psammobatis normani</i> McEachran, 1983                 | Shortfin sandskate        |   |   |   | x | yes        | no  | [1]                  | LC | 2019 |
| <i>Psammobatis parvacauda</i> McEachran, 1983              | Smalltail sandskate       |   |   |   | x | no         | no  |                      | DD | 2007 |
| <i>Psammobatis rudis</i> Günther, 1870                     | Smallthorn sandskate      |   |   |   | x | yes        | no  | [1]                  | LC | 2019 |
| <i>Psammobatis rutrum</i> Jordan, 1891                     | Spade sandskate           |   |   |   | x | this study | no  |                      | LC | 2019 |
| <i>Raja asterias</i> Delaroche, 1809                       | Mediterranean starry ray  | x |   |   |   | yes        | yes | [13,19]              | NT | 2014 |
| <i>Raja brachyura</i> Lafont, 1871                         | Blonde ray                | x | x |   |   | yes        | yes | [3,5,11,13,16,17,19] | NT | 2008 |
| <i>Raja clavata</i> Linnaeus, 1758                         | Thornback ray             | x | x | x |   | yes        | yes | [3–5,11,13,16–19,21] | NT | 2005 |
| <i>Raja herwigii</i> Krefft, 1965                          | Cape Verde skate          |   | x |   |   | yes*       | no  | Unpublished          | DD | 2007 |
| <i>Raja maderensis</i> Lowe, 1838                          | Madeira skate             |   | x |   |   | yes        | no  | [16,22]              | VU | 2014 |
| <i>Raja mauritaniensis</i> <sup>2</sup> Capapé, 1977       | African ray               |   | x |   |   | no         | no  |                      | NE | -    |
| <i>Raja microocellata</i> Montagu, 1818                    | Small-eyed ray            | x | x |   |   | yes        | no  | [5,16]               | NT | 2006 |
| <i>Raja miraletus</i> Linnaeus, 1758                       | Brown ray                 | x | x |   |   | yes        | yes | [4,11,13,16–19,21]   | LC | 2019 |
| <i>Raja montagui</i> Fowler, 1910                          | Spotted ray               | x | x |   |   | yes        | yes | [3–5,11,13,16,19]    | LC | 2007 |
| <i>Raja ocellifera</i> Regan, 1906                         | Twineye skate             |   |   |   | x | yes        | no  | Unpublished          | EN | 2020 |
| <i>Raja parva</i> Last & Séret, 2016                       | African brown skate       |   | x | x |   | yes**      | no  | [23]                 | NE | -    |
| <i>Raja straeleni</i> Poll, 1951                           | Biscuit skate             |   | x | x |   | yes        | no  | [20]                 | DD | 2009 |
| <i>Raja undulata</i> Lacepède, 1802                        | Undulate ray              | x | x |   |   | yes        | yes | [13,16]              | EN | 2003 |

|                                                       |                    |   |   |            |     |             |               |      |      |
|-------------------------------------------------------|--------------------|---|---|------------|-----|-------------|---------------|------|------|
| <i>Rajella barnardi</i> (Norman, 1935)                | Bigthorn skate     | x | x | yes        | no  | Unpublished | LC            | 2004 |      |
| <i>Rajella bathyphila</i> (Holt & Byrne, 1908)        | Deep-water ray     | x | x | this study | yes | [2]         | LC            | 2019 |      |
| <i>Rajella bigelowi</i> (Stehmann, 1978)              | Bigelow's ray      | x | x | yes        | yes | Unpublished | LC            | 2019 |      |
| <i>Rajella caudaspinosa</i> (von Bonde & Swart, 1923) | Munchskin skate    |   | x | this study | no  |             | LC            | 2019 |      |
| <i>Rajella dissimilis</i> (Hulley, 1970)              | Ghost skate        |   | x | yes        | no  | [4,20]      | LC            | 2004 |      |
| <i>Rajella fyllae</i> (Lütken, 1887)                  | Round ray          | x |   | yes        | yes | [2,3]       | LC            | 2019 |      |
| <i>Rajella kukujevi</i> (Dolganov, 1985)              | Mid-Atlantic skate | x |   | yes        | no  | [12]        | LC            | 2014 |      |
| <i>Rajella leoparda</i> (von Bonde & Swart, 1923)     | Leopard skate      |   | x | yes        | no  | Unpublished | LC            | 2018 |      |
| <i>Rajella lintea</i> (Fries, 1838)                   | Sailray            | x |   | yes        | yes | [3]         | LC            | 2019 |      |
| <i>Rajella ravidula</i> (Hulley, 1970)                | Smoothback skate   |   | x | no         | no  |             | LC            | 2019 |      |
| <i>Rajella sadowskii</i> (Kreff & Stehmann, 1974)     | Brazilian skate    |   |   | x          | no  | no          | DD            | 2004 |      |
| <i>Rioraja agassizii</i> (Müller & Henle, 1841)       | Rio skate          |   |   | x          | yes | no          | [1,7]         | VU   | 2019 |
| <i>Rostroraja alba</i> (Lacepède, 1803)               | White skate        | x | x | x          | yes | yes         | [13,16,18–20] | EN   | 2006 |
| <i>Sympterygia acuta</i> Garman, 1877                 | Bignose fanskate   |   |   | x          | yes | no          | [1]           | CR   | 2019 |
| <i>Sympterygia bonapartii</i> Müller & Henle, 1841    | Smallnose fanskate |   |   | x          | yes | no          | [1]           | NT   | 2019 |
| <i>Zearaja brevicaudata</i> (Marini, 1933)            |                    |   |   | x          | yes | no          | [27]          | NE   | -    |

<sup>1</sup> These species were considered possibly conspecific with *Amblyraja hyperborea* by Weighman [28] and treated as junior synonym of *A. hyperborea* by Last et al. [29].

<sup>2</sup> *Raja mauritaniensis* was proposed as a replacement name for the junior homonym *Raja Africana* by White & Fricke [30]. The species had previously been treated as a questionably valid species by Weighman [28] and Last et al. [29].

\*Sequences deposited in BOLD but not publicly available.

\*\*Sequences not deposited in BOLD or GenBank.

**Table S2.** Primer sequences in 5'-3' direction, final concentration ( $C_i$ , in mM) and annealing temperature ( $T_a$ , in °C) utilised in this study for PCR amplification of the two partial mitochondrial fragments Cytochrome Oxidase subunit I (COI) and Nycotinamide dehydrogenase subunit 2 (NADH2). Grey boxes mark the M13-sequencing primer.

| Region | Primers 5'-3'                                           | $C_i$ mM | $T_a$ °C | Reference |
|--------|---------------------------------------------------------|----------|----------|-----------|
| COI    | FishF2: TCGACTAATCATAAAGATATCGGCAC                      | 0.5      | 54       | [24]      |
|        | FishR2: ACTTCAGGGTGACCGAAGAATCAGAA                      |          |          |           |
|        | VF2_t1: TGTAACGACGGCCAGTCAACCAACCACAAAGACATTGGCAC       | 0.2      | 52       | [25]      |
|        | Fish F2_t1: TGTAACGACGGCCAGTTCGACTAATCATAAAGATATCGGCAC  |          |          |           |
|        | FR1d_t1: CAGGAAACAGCTATGACACCTCAGGGTGTCCGAARAAYCARAA    |          |          |           |
|        | Fish R2_t1: CAGGAAACAGCTATGACACTTCAGGGTGACCGAAGAATCAGAA |          |          |           |
|        | FF2d: TTCTCCACCAACCACAARGAYATYGG                        | 0.2      | 52       | [25]      |
|        | FR1d: CACCTCAGGGTGTCCGAARAAYCARAA                       |          |          |           |
| NADH2  | NADH2 Skates FW2: CTACTAATGAACCCCTCGT                   | 0.2      | 55       | [21]      |
|        | NADH2 Skates RV: GCTTTGAAGGCTTTTGGT                     |          |          |           |
|        | ND2Met47: TTTTGGGCCCATACC                               | 0.5      | 54       | [26]      |
|        | ND2Trp18: GCTTTGAAGGCTTTTGGT                            |          |          |           |

**Table S3.** Cases of specimen misidentification. Percentage of similarity (through BOLD Identification Engine) and sampling area of the individuals are presented; the number of misidentified individuals in relation to the total number assessed is provided in parenthesis in the Morphological ID and Barcode ID column.

| Morphological ID                      | Barcode ID                                      | BOLD ID (% Similarity) | Major ocean area, Location | E-Voucher morphological evaluation |
|---------------------------------------|-------------------------------------------------|------------------------|----------------------------|------------------------------------|
| <i>Amblyraja radiata</i> (1/20)       | <i>Rajella fyllae</i> (1/14)                    | 99.69-100              | NEA Iceland                | <i>R. fyllae</i>                   |
| <i>Atlantoraja castelnaui</i> (1/19)  | <i>Atlantoraja cyclophora</i> (1/25)            | 99.85-100              | SWA Brazil                 | <i>A. cyclophora</i>               |
| <i>Atlantoraja cyclophora</i> (1/26)  | <i>Atlantoraja platana</i> (1/26)               | 100                    | SWA Brazil                 | <i>A. platana</i>                  |
| <i>Cruriraja</i> sp. (3/4)            | <i>Rajella barnardi</i> (3/13)                  | 99.5                   | SEA Angola                 | No available picture               |
| <i>Cruriraja</i> sp. (1/4)            | <i>Rajella leoparda</i> (1/22)                  | 99.66                  | SEA Angola                 | Juvenile                           |
| <i>Cruriraja hulleyi</i> (1/22)       | <i>Raja straeleni</i> (1/20)                    | 100                    | SEA South Africa           | Juvenile                           |
| <i>Dipturus pullopunctatus</i> (2/10) | <i>Rostroraja alba</i> (2/14)                   | 100                    | SEA South Africa           | No available picture               |
| <i>Leucoraja fullonica</i> (1/3)      | <i>Dipturus batis</i> (1/10)                    | 100                    | NEA Iceland                | No available picture               |
| <i>Leucoraja wallacei</i> (1/17)      | <i>Raja straeleni</i> (1/20)                    | 100                    | SEA South Africa           | Juvenile                           |
| <i>Psammobatis extenta</i> (1/1)      | <i>Psammobatis rutrum</i> (1/10)                | 100                    | SWA Brazil                 | <i>P. rutrum</i>                   |
| <i>Raja</i> sp. (7/7)                 | <i>Raja herwigi</i> – <i>Raja clavata</i> (7/7) | 98.77-98.44            | SEA Angola                 | <i>Raja</i> sp.                    |
| <i>Rajella caudaspinosa</i> (1/8)     | <i>Cruriraja hulleyi</i> (1/21)                 | 100                    | SEA South Africa           | No available picture               |
| <i>Rajella caudaspinosa</i> (1/8)     | <i>Rajella barnardi</i> (1/13)                  | 99.5                   | SEA South Africa           | <i>R. barnardi</i>                 |
| <i>Rajella caudaspinosa</i> (2/8)     | <i>Rajella leoparda</i> (2/22)                  | 99.66                  | SEA South Africa           | <i>R. leoparda</i>                 |
| <i>Rajella dissimilis</i> (1/7)       | <i>Raja straeleni</i> (1/20)                    | 100                    | SEA South Africa           | Juvenile                           |
| <i>Rajella leoparda</i> (1/28)        | <i>Cruriraja hulleyi</i> (1/21)                 | 100                    | SEA South Africa           | No available picture               |
| <i>Rajella leoparda</i> (1/28)        | <i>Raja straeleni</i> (1/20)                    | 100                    | SEA South Africa           | Juvenile                           |
| <i>Rajella leoparda</i> (4/28)        | <i>Rajella dissimilis</i> (4/6)                 | 100                    | SEA South Africa           | <i>R. dissimilis</i>               |
| <i>Rioraja agassizii</i> (2/12)       | <i>Atlantoraja platana</i> (2/26)               | 100                    | SWA Brazil                 | <i>A. platana</i>                  |
| <i>Rostroraja alba</i> (1/16)         | <i>Cruriraja hulleyi</i> (1/21)                 | 100                    | SEA South Africa           | No available picture               |
| <i>Rostroraja alba</i> (2/16)         | <i>Raja straeleni</i> (2/20)                    | 99.33-99.5             | SEA South Africa           | No available picture               |

**Table S4.** Sequence diversity for Cytochrome Oxidase subunit I for Atlantic skates included in the present study. For each taxon, the following fields are presented: number of individuals (N), maximum intraspecific genetic distance (Max Intra-Sp), distance to nearest neighbour (Distance to NN), number of haplotypes (nH), haplotype diversity (Hd), nucleotide diversity ( $\pi$ ), sampling locations, Barcode Index Number (BIN) obtained from BOLD (blue text refers to Unique BIN, red text refers to Discordant BIN, black text refers to Concordant BIN), and abbreviation ID used in phylogenetic analyses. IUCN Categories are also indicated: least concern (LC), near threatened (NT), vulnerable (VU), endangered (EN), critically endangered (CR), not evaluated (NE).

| Species                        | N  | Max Intra-Sp | Distance to NN | Geographical areas                                  | IUCN category | BIN          | Elasmo-Atl/ Total number in BOLD | ID     |
|--------------------------------|----|--------------|----------------|-----------------------------------------------------|---------------|--------------|----------------------------------|--------|
| ARHYNCHOBATIDAE                |    |              |                |                                                     |               |              |                                  |        |
| <i>Atlantoraja castelnaui</i>  | 18 | 0.17         | 8.33           | SWA Brazil                                          | CR            | BOLD:AAB4961 | 18/30                            | Atcas1 |
| <i>Atlantoraja cyclophora</i>  | 25 | 1.03         | 4.49           | SWA Brazil                                          | EN            | BOLD:AAB1882 | 25/35                            | Atcyc1 |
| <i>Atlantoraja platana</i>     | 26 | 0.34         | 4.49           | SWA Brazil                                          | EN            | BOLD:AAB1884 | 26/29                            | Atpla1 |
| <i>Bathyraja richardsoni</i>   | 6  | 0.37         | 3.04           | NEA Mid-Atlantic Ridge                              | LC            | BOLD:AAA8067 | 6/10                             | Bric1  |
| <i>Bathyraja spinicauda</i>    | 10 | 0.52         | 3.04           | NEA Iceland                                         | NT            |              | 10/225                           | Bspi1  |
| <i>Psammobatis rutrum</i>      | 10 | 0.52         | 10.94          | SWA Brazil                                          | LC            | BOLD:AAE0763 | 10/10                            | Prut1  |
| <i>Rioraja agassizii</i>       | 10 | 0.69         | 9.3            | SWA Brazil                                          | VU            | BOLD:AAB1883 | 10/29                            | Raga1  |
| GURGESIELLIDAE                 |    |              |                |                                                     |               |              |                                  |        |
| <i>Cruriraja huleyi</i>        | 21 | 0.52         | 15.78          | SEA South Africa                                    | LC            | BOLD:AAB7055 | 21/30                            | Chul1  |
| RAJIDAE                        |    |              |                |                                                     |               |              |                                  |        |
| <i>Amblyraja hyperborea</i>    | 13 | 0.34         | 2.69           | NEA Iceland                                         | LC            | BOLD:ABZ5141 | 13/207                           | Ahyp1  |
| <i>Amblyraja radiata</i>       | 19 | 1.20         | 2.69           | NEA Iceland                                         | VU            | BOLD:AAA4500 | 19/259                           | Arad1  |
| <i>Dipturus pullopunctatus</i> | 9  | 0.00         | 6.14           | SEA South Africa                                    | LC            | BOLD:AAD3653 | 9/38                             | Dpul1  |
| <i>Dipturus batis</i>          | 10 | 0.69         | 3.61           | NEA Iceland; Western English Channel                | CR            | BOLD:AAC0752 | 10/33                            | Dbat1  |
| <i>Dipturus intermedius</i>    | 5  | 0.00         | 3.61           | NEA Western English Channel                         | NE            | BOLD:AAA8675 | 5/41                             | Dint1  |
| <i>Dipturus nidarosiensis</i>  | 1  | N/A          | 5.81           | CEA Morocco                                         | NT            | BOLD:AAE1030 | 1/14                             | Dnid1  |
| <i>Leucoraja fullonica</i>     | 2  | 0.00         | 6.06           | NEA Celtic Sea                                      | VU            | BOLD:AAE3437 | 2/8                              | Lful1  |
| <i>Leucoraja naevus</i>        | 2  | 0.52         | 2.39           | NEA Celtic Sea                                      | LC            | BOLD:AAB0817 | 2/70                             | Lnae1  |
| <i>Leucoraja wallacei</i>      | 16 | 0.69         | 2.39           | SEA South Africa                                    | VU            | BOLD:ABZ1536 | 16/23                            | Lwal1  |
| <i>Raja brachyura</i>          | 2  | 0.52         | 4.59           | NEA Celtic Sea; Portugal                            | NT            | BOLD:AAA4358 | 2/59                             | Rbra1  |
| <i>Raja clavata</i>            | 14 | 0.70         | 0.91           | NEA Celtic Sea; Irish Sea; North Sea; Norwegian Sea | NT            | BOLD:ACF2419 | 16/143                           | Rcla1  |
| <i>Raja maderensis</i>         | 2  | 0.00         | 0.91           | CEA Madeira                                         | VU            |              |                                  | Rmad1  |

|                                    |    |      |      |                                                          |    |                              |        |        |
|------------------------------------|----|------|------|----------------------------------------------------------|----|------------------------------|--------|--------|
| <i>Raja microocellata</i>          | 4  | 0.17 | 4.59 | NEA Bristol Channel, Bay of Biscay                       | NT | BOLD:AAE7627                 | 4/7    | Rmic1  |
| <i>Raja cf. miraletus Angola 1</i> | 13 | 0.64 | 2.55 | SEA Angola                                               | LC | <a href="#">BOLD:ABZ6837</a> | 13/13  | Rmir10 |
| <i>Raja cf. miraletus Angola 2</i> | 4  | 0.00 | 3    | SEA Angola                                               |    | <a href="#">BOLD:AAA4475</a> | 4/4    | Rmir5  |
| <i>Raja cf. miraletus Senegal</i>  | 4  | 0.41 | 5.15 | CEA Cape Verde                                           |    | BOLD:AAZ1588                 | 4/5    | Rmir1  |
| <i>Raja ocellifera</i>             | 13 | 0.64 | 2.55 | SEA South Africa                                         | EN | BOLD:AAA4359                 | 13/20  | Rmir32 |
| <i>Raja montagui</i>               | 63 | 0.34 | 5.26 | NEA Celtic Sea; Irish Sea                                | LC | BOLD:AAA4356                 | 63/110 | Rmon1  |
| <i>Raja sp.</i>                    | 7  | 0.00 | 1.76 | SEA Angola                                               |    | <a href="#">BOLD:AAA4361</a> | 7/7    | Rsp1   |
| <i>Raja straeleni</i>              | 20 | 1.03 | 1.46 | SEA South Africa                                         | DD | BOLD:ACF2420                 | 20/26  | Rstr1  |
| <i>Raja undulata</i>               | 2  | 0.17 | 6.78 | NEA Bay of Biscay; Western English Channel               | EN | BOLD:AAL0858                 | 2/12   | Rund1  |
| <i>Rajella barnardi</i>            | 13 | 0.34 | 0.82 | SEA Angola; South Africa                                 | LC | <b>BOLD:AAA4360</b>          | 35/37  | Rlbar1 |
| <i>Rajella leoparda</i>            | 22 | 0.34 | 0.82 | SEA Angola; South Africa                                 | LC |                              |        | Rlleo1 |
| <i>Rajella bathyphila</i>          | 3  | 0.00 | 2.78 | NEA Iceland                                              | LC | BOLD:ABZ5259                 | 3/20   | Rlbat1 |
| <i>Rajella caudaspinosa</i>        | 4  | 0.34 | 2.49 | SEA South Africa                                         | LC | <a href="#">BOLD:ADK9017</a> | 4/4    | Rlcau1 |
| <i>Rajella dissimilis</i>          | 6  | 0.34 | 1.43 | SEA South Africa                                         | LC | BOLD:ACF1708                 | 6/9    | Rldis1 |
| <i>Rajella fyllae</i>              | 14 | 0.86 | 2.49 | NEA Iceland                                              | LC | BOLD:AAA4502                 | 14/79  | Rlfyl1 |
| <i>Rajella kukujevi</i>            | 4  | 0    | 1.43 | NEA mid-Atlantic Ridge; Bay of Biscay; Ireland; Scotland | LC | BOLD:ACF1707                 | 4/10   | Rlkuk1 |
| <i>Rajella lintea</i>              | 1  | 0    | 3.96 | NEA Iceland                                              | LC | BOLD:AAD0011                 | 1/17   | Rllin  |
| <i>Rostroraja alba</i>             | 14 | 0    | 11.8 | SEA South Africa                                         | EN | BOLD:AAB8691                 | 14/26  | Ralb1  |



**Table S5.** Substitution saturation test measuring whether the observed index of substitution saturation (Iss) is significantly lower than critical Iss value (Iss.c), with different numbers of operational taxonomic units (Num.OTU) for COI and NADH2.

| Marker | Num.OTU | Iss   | Iss.c | T      | DF  | P     |
|--------|---------|-------|-------|--------|-----|-------|
| NADH2  | 4       | 0.315 | 0.806 | 21.246 | 443 | 0.000 |
|        | 8       | 0.316 | 0.767 | 18.828 | 443 | 0.000 |
|        | 16      | 0.317 | 0.746 | 18.013 | 443 | 0.000 |
|        | 32      | 0.324 | 0.720 | 16.730 | 443 | 0.000 |
| COI    | 4       | 0.387 | 0.802 | 13.818 | 255 | 0.000 |
|        | 8       | 0.376 | 0.761 | 12.926 | 255 | 0.000 |
|        | 16      | 0.378 | 0.737 | 12.622 | 255 | 0.000 |
|        | 32      | 0.384 | 0.712 | 11.907 | 255 | 0.000 |

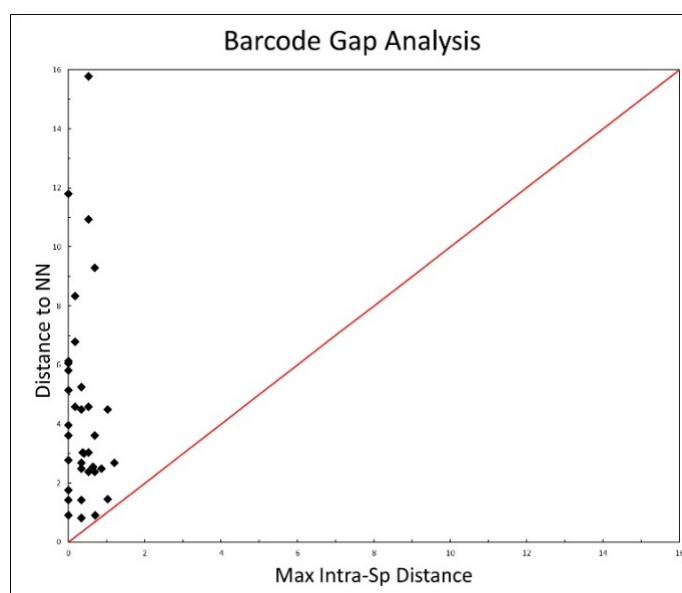

**Figure S1.** Maximum intraspecific distance plotted against the minimum inter-specific (Nearest Neighbour) distances (p-distance values) for the COI barcode sequences of the 38 MOTUs. The 1:1 equivalence (straight line) is indicated.



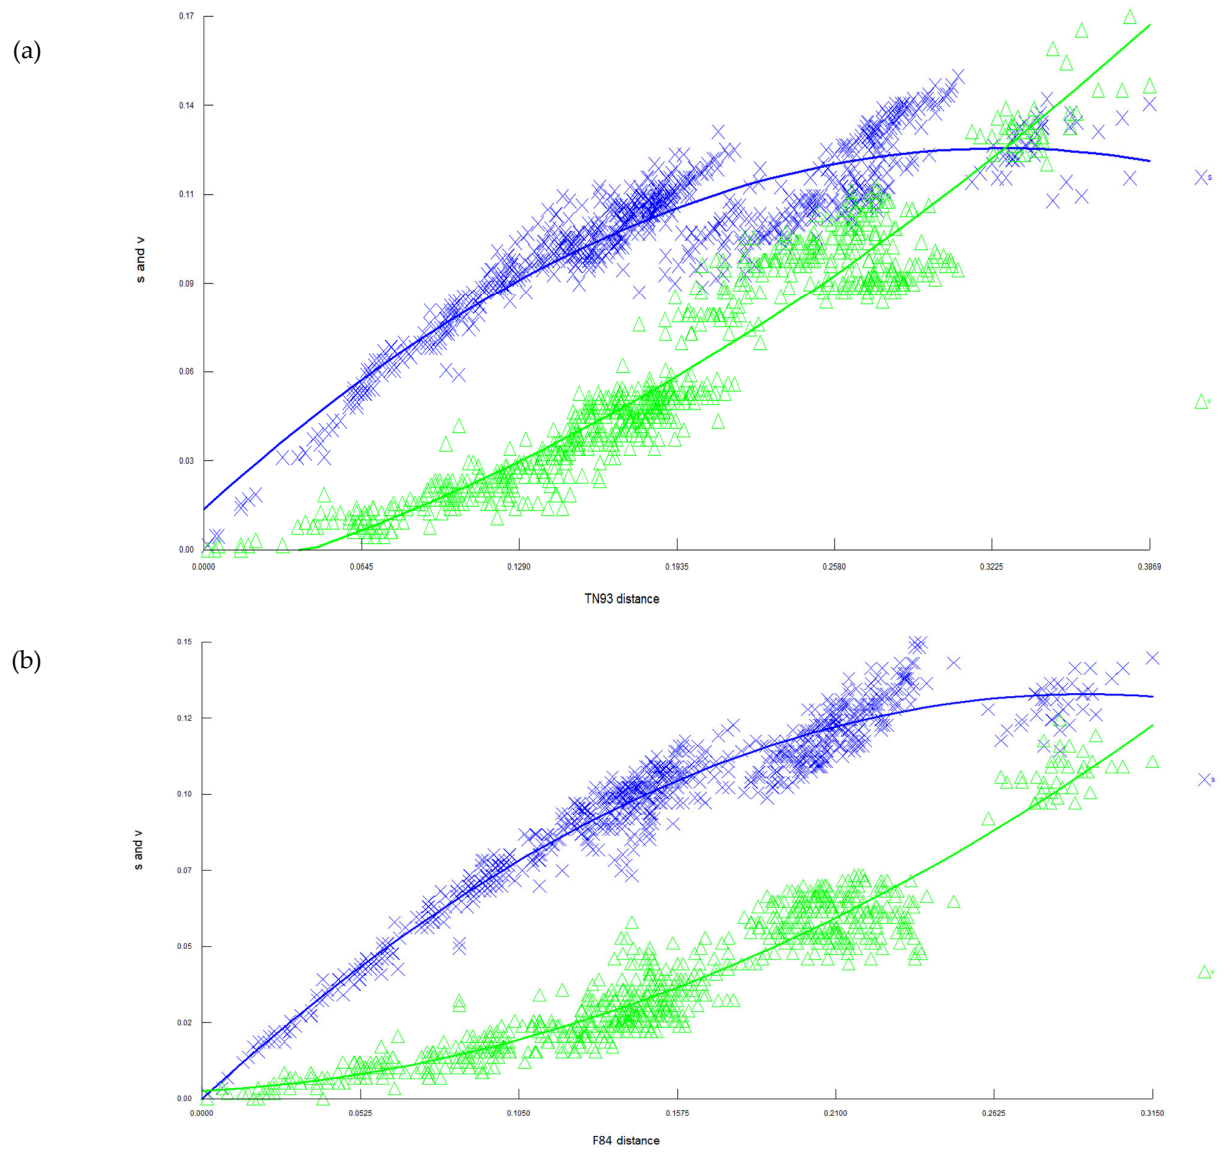

**Figure S3.** Plot of the number of transitions (s, blue cross) and transversions (v, green triangle) vs. genetic distance. The curves show the trends of variance of transitions and transversions with increasing genetic distance. a) NADH2; b) COI.

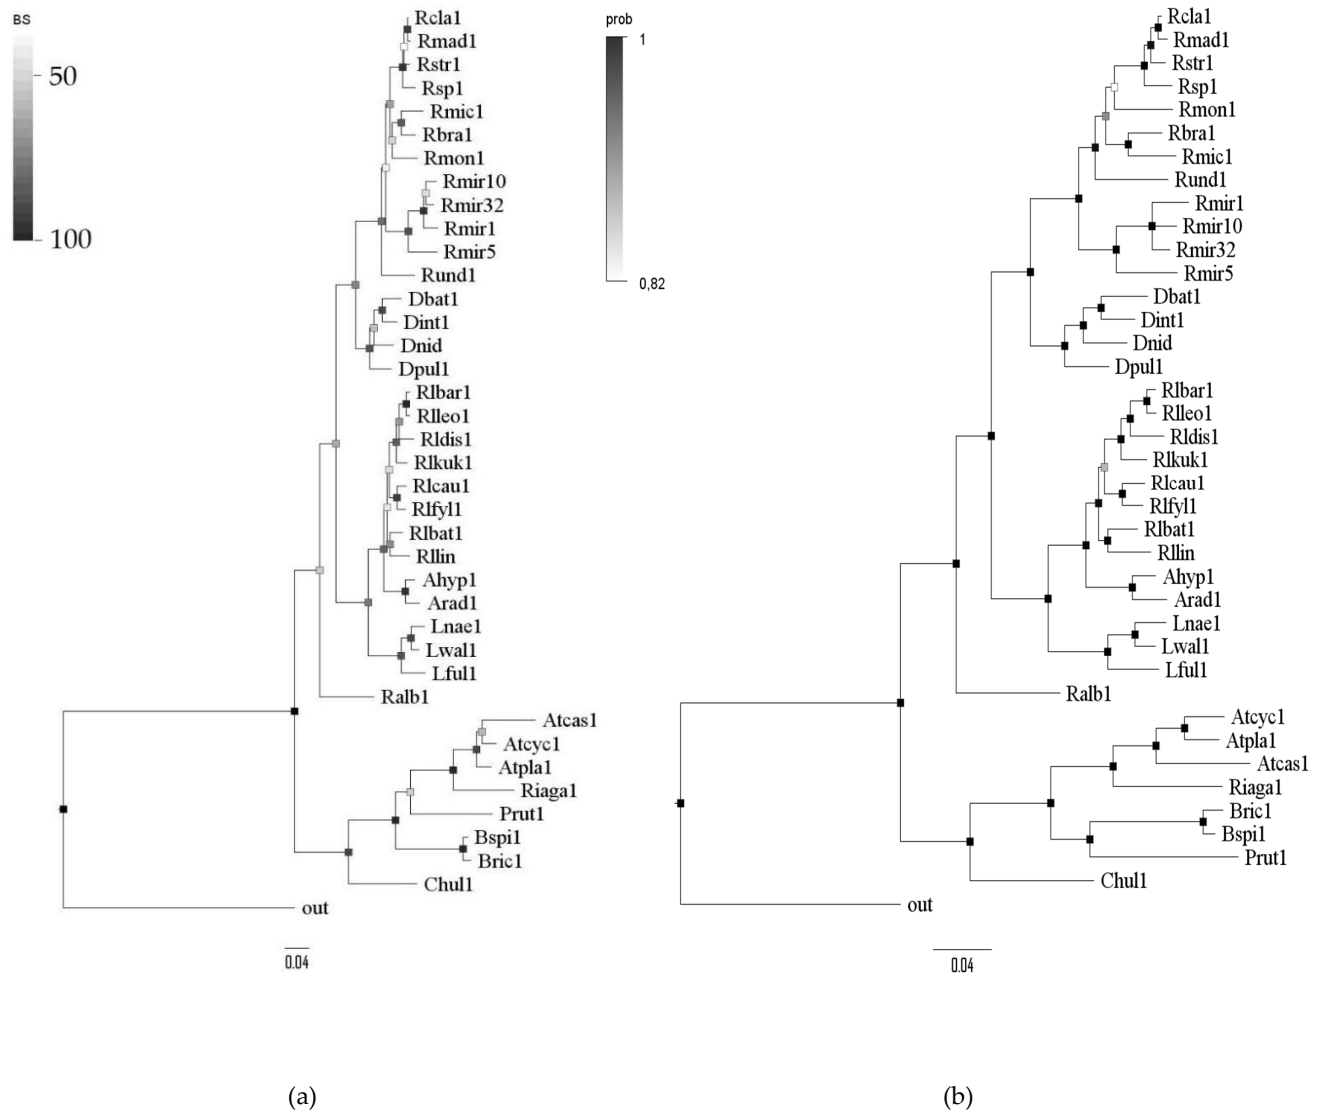

**Figure S4.** Maximum-likelihood (a) and Bayesian (b) phylogenetic trees based on concatenated NADH2 and COI datasets. Statistical measures of Maximum-likelihood bootstrap (BS) and Bayesian posterior probability (prob) support are shown at each node. A distance scale bar is given. Names at tips are consistent with the column “ID” in Table S4. The outgroup (out) is represented by homologous sequence of *Squalus acanthias* (GenBank code: NC\_002012).

## References

1. Mabrugaña, E.; Astarloa, J.M.D. de; Hanner, R.; Zhang, J.; Castro, M.G. DNA Barcoding Identifies Argentine Fishes from Marine and Brackish Waters. *PLOS ONE* **2011**, *6*, e28655, doi:10.1371/journal.pone.0028655.
2. Coulson, M.W.; Denti, D.; Guelpen, L.V.; Miri, C.; Kenchington, E.; Bentzen, P. DNA Barcoding of Canada's Skates. *Mol. Ecol. Resour.* **2011**, *11*, 968–978, doi:https://doi.org/10.1111/j.1755-0998.2011.03034.x.
3. Lynghammar, A.; Christiansen, J.S.; Griffiths, A.M.; Fevolden, S.-E.; Hop, H.; Bakken, T. DNA Barcoding of the Northern North-east Atlantic Skates (Chondrichthyes, Rajiformes), with Remarks on the Widely Distributed Starry Ray. *Zool. Scr.* **2014**, *43*, 485–495, doi:https://doi.org/10.1111/zsc.12064.
4. Lago, F.C.; Vieites, J.M.; Espiñeira, M. Development of a FINS- Based Method for the Identification of Skates Species of Commercial Interest. *Food Control* **2012**, *24*, 38–43, doi:10.1016/j.foodcont.2011.08.034.
5. Kneibelsberger, T.; Landi, M.; Neumann, H.; Kloppmann, M.; Sell, A.F.; Campbell, P.D.; Laakmann, S.; Raupach, M.J.; Carvalho, G.R.; Costa, F.O. A Reliable DNA Barcode Reference Library for the Identification of the North European Shelf Fish Fauna. *Mol. Ecol. Resour.* **2014**, *14*, 1060–1071, doi:https://doi.org/10.1111/1755-0998.12238.
6. Ribeiro, A. de O.; Caires, R.A.; Mariguela, T.C.; Pereira, L.H.G.; Hanner, R.; Oliveira, C. DNA Barcodes Identify Marine Fishes of São Paulo State, Brazil. *Mol. Ecol. Resour.* **2012**, *12*, 1012–1020, doi:https://doi.org/10.1111/1755-0998.12007.
7. Ferrette, B.L. da S.; Domingues, R.R.; Rotundo, M.M.; Miranda, M.P.; Bunholi, I.V.; De Biasi, J.B.; Oliveira, C.; Foresti, F.; Mendonça, F.F. DNA Barcode Reveals the Bycatch of Endangered Batoids Species in the Southwest Atlantic: Implications for Sustainable Fisheries Management and Conservation Efforts. *Genes* **2019**, *10*, 304, doi:10.3390/genes10040304.
8. Smith, P.J.; Steinke, D.; Mcveagh, S.M.; Stewart, A.L.; Struthers, C.D.; Roberts, C.D. Molecular Analysis of Southern Ocean Skates (*Bathyrhaja*) Reveals a New Species of Antarctic Skate. *J. Fish Biol.* **2008**, *73*, 1170–1182, doi:10.1111/j.1095-8649.2008.01957.x.
9. Spies, I.B.; Gaichas, S.; Stevenson, D.E.; Orr, J.W.; Canino, M.F. DNA-Based Identification of Alaska Skates (*Amblyraja*, *Bathyrhaja* and *Raja*: Rajidae) Using Cytochrome c Oxidase Subunit I (CoI) Variation. *J. Fish Biol.* **2006**, *69*, 283–292, doi:https://doi.org/10.1111/j.1095-8649.2006.01286.x.
10. Cannas, R.; Follesa, M.C.; Cabiddu, S.; Porcu, C.; Salvadori, S.; Iglésias, S.P.; Deiana, A.M.; Cau, A. Molecular and Morphological Evidence of the Occurrence of the Norwegian Skate *Dipturus Nidarosensis* (Storm, 1881) in the Mediterranean Sea. *Mar. Biol. Res.* **2010**, *6*, 341–350, doi:10.1080/17451000903428496.
11. Costa, F.O.; Landi, M.; Martins, R.; Costa, M.H.; Costa, M.E.; Carneiro, M.; Alves, M.J.; Steinke, D.; Carvalho, G.R. A Ranking System for Reference Libraries of DNA Barcodes: Application to Marine Fish Species from Portugal. *PLOS ONE* **2012**, *7*, e35858, doi:10.1371/journal.pone.0035858.
12. Rodríguez-Cabello, C.; Pérez, M.; Sánchez, F. New Records of Chondrichthyans Species Caught in the Cantabrian Sea (Southern Bay of Biscay). *J. Mar. Biol. Assoc. U. K.* **2013**, *93*, 1929–1939, doi:10.1017/S0025315413000271.
13. Cariani, A.; Messinetti, S.; Ferrari, A.; Arculeo, M.; Bonello, J.J.; Bonnici, L.; Cannas, R.; Carbonara, P.; Cau, A.; Charilaou, C.; et al. Improving the Conservation of Mediterranean Chondrichthyans: The ELASMOMED DNA Barcode Reference Library. *PLOS ONE* **2017**, *12*, e0170244, doi:10.1371/journal.pone.0170244.
14. Ramírez-Amaro, S.; Ordines, F.; Puerto, M.Á.; García, C.; Ramon, C.; Terrasa, B.; Massutí, E. New Morphological and Molecular Evidence Confirm the Presence of the Norwegian Skate *Dipturus Nidarosensis* (Storm, 1881) in the Mediterranean Sea and Extend Its Distribution to the Western Basin. *Mediterr. Mar. Sci.* **2017**, *18*, 251–259, doi:10.12681/mms.1950.
15. Carbonara, P.; Cannas, R.; Donnaloia, M.; Melis, R.; Porcu, C.; Spedicato, M.T.; Zupa, W.; Follesa, M.C. On the Presence of *Dipturus Nidarosensis* (Storm, 1881) in the Central Mediterranean Area. *PeerJ* **2019**, *7*, doi:10.7717/peerj.7009.
16. Serra-Pereira, B.; Moura, T.; Griffiths, A.M.; Gordo, L.S.; Figueiredo, I. Molecular Barcoding of Skates (Chondrichthyes: Rajidae) from the Southern Northeast Atlantic. *Zool. Scr.* **2011**, *40*, 76–84, doi:https://doi.org/10.1111/j.1463-6409.2010.00461.x.
17. Landi, M.; Dimech, M.; Arculeo, M.; Biondo, G.; Martins, R.; Carneiro, M.; Carvalho, G.R.; Brutto, S.L.; Costa, F.O. DNA Barcoding for Species Assignment: The Case of Mediterranean Marine Fishes. *PLOS ONE* **2014**, *9*, e106135, doi:10.1371/journal.pone.0106135.
18. Vella, A.; Vella, N.; Schembri, S. A Molecular Approach towards Taxonomic Identification of Elasmobranch Species from Maltese Fisheries Landings. *Mar. Genomics* **2017**, *36*, 17–23, doi:10.1016/j.margen.2017.08.008.
19. Ramírez-Amaro, S.; Ordines, F.; Picornell, A.; Castro, J.A.; Ramon, C.; Massutí, E.; Terrasa, B. The Evolutionary History of Mediterranean Batoidea (Chondrichthyes: Neoselachii). *Zool. Scr.* **2018**, *47*, 686–698, doi:https://doi.org/10.1111/zsc.12315.
20. Steinke, D.; Connell, A.D.; Hebert, P.D.N. Linking Adults and Immatures of South African Marine Fishes. *Genome* **2016**, doi:10.1139/gen-2015-0212.
21. Ferrari, A.; Tinti, F.; Maresca, V.B.; Velonà, A.; Cannas, R.; Thasitis, I.; Costa, F.O.; Follesa, M.C.; Golani, D.; Hemida, F.; et al. Natural History and Molecular Evolution of Demersal Mediterranean Sharks and Skates Inferred by Comparative Phylogeographic and Demographic Analyses. *PeerJ* **2018**, *6*, e5560, doi:10.7717/peerj.5560.
22. Ball, R.E.; Serra-Pereira, B.; Ellis, J.; Genner, M.J.; Iglésias, S.; Johnson, A.F.; Jones, C.S.; Leslie, R.; Lewis, J.; Mariani, S.; et al. Resolving Taxonomic Uncertainty in Vulnerable Elasmobranchs: Are the Madeira Skate (*Raja Maderensis*) and the Thornback Ray (*Raja Clavata*) Distinct Species? *Conserv. Genet.* **2016**, *17*, 565–576, doi:10.1007/s10592-015-0806-1.
23. Last; Séret A New Eastern Central Atlantic Skate *Raja Parva* Sp. Nov. (Rajoidei: Rajidae) Belonging to the *Raja Miraletus* Species Complex. *Zootaxa* **2016**, *4147*, 477–489, doi:10.11646/zootaxa.4147.4.8.
24. Ward, R.D.; Zemlak, T.S.; Innes, B.H.; Last, P.R.; Hebert, P.D.N. DNA Barcoding Australia's Fish Species. *Philos. Trans. R. Soc. B Biol. Sci.* **2005**, *360*, 1847–1857, doi:10.1098/rstb.2005.1716.

25. Ivanova, N.V.; Zemlak, T.S.; Hanner, R.H.; Hebert, P.D.N. Universal Primer Cocktails for Fish DNA Barcoding. *Mol. Ecol. Notes* **2007**, *7*, 544–548, doi:<https://doi.org/10.1111/j.1471-8286.2007.01748.x>.
26. Sandoval-Castillo, J.; Rocha-Olivares, A. Deep Mitochondrial Divergence in Baja California Populations of an Aquilopelagic Elasmobranch: The Golden Cownose Ray. *J. Hered.* **2011**, *102*, 269–274, doi:[10.1093/jhered/esr004](https://doi.org/10.1093/jhered/esr004).
27. Gabbanelli, V.; Díaz de Astarloa, J.M.; Gonzalez-Castro, M.; Vazquez, D.M.; Mabragaña, E. Almost a Century of Oblivion: Integrative Taxonomy Allows the Resurrection of the Longnose Skate *Zearaja Brevicaudata* (Marini, 1933) (Rajiformes; Rajidae). *C. R. Biol.* **2018**, *341*, 454–470, doi:[10.1016/j.crvi.2018.10.002](https://doi.org/10.1016/j.crvi.2018.10.002).
28. Weigmann, S. Annotated Checklist of the Living Sharks, Batoids and Chimaeras (Chondrichthyes) of the World, with a Focus on Biogeographical Diversity. *J. Fish Biol.* **2016**, *88*, 837–1037, doi:<https://doi.org/10.1111/jfb.12874>.
29. Last, P.; Weigmann, S.; Yang, L. Changes to the nomenclature of the skates (Chondrichthyes: Rajiformes). In: Last, P.R. & Yearsley, G.K. (Eds.) *Rays of the World: Supplementary information*, CSIRO Australian National Fish Collection: Canberra, Australia, 2016, CSIRO Special Publication: 11–34.
30. White, W.T.; Fricke, R. *Raja Mauritanensis*: A replacement name for *Raja Africana* Capapé, 1977 (Rajiformes: Rajidae), a junior homonym of *Raja Africana* Bloch & Schneider, 1801 (Myliobatiformes: Dasyatidae). *Zootaxa* **2021**, *4970*, 399–400, doi:<https://doi.org/10.11646/zootaxa.4970.2.12>.
